# Supplementary material
Source: PubMed Central journal article supplement (PMC1639510)
Supplement: rspb20063657s15.pdf [file rspb20063657s15.pdf]

## ESM2

Results of ANOVAs for  $\pi_s$  when data are grouped by genus (see main text). Results are given for one-way ANOVAs (first group), two-way ANOVAs including mating system (second group), two-way ANOVAs including family effects (third group), and three-way ANOVAs including mating system and family effects (last group).  $R^2$  are given either for one factor or for a couple of factor (excluding family).

| Factors                |                   | $n$               | $R^2$ | $p_{\text{value}}$ |               |              |
|------------------------|-------------------|-------------------|-------|--------------------|---------------|--------------|
|                        |                   |                   |       | Factor 1           | Factor 2      |              |
| Without family effects | Mating system     | 79                | 0.122 | <b>0.002</b>       |               |              |
|                        | Life form         | 93                | 0.031 | 0.219              |               |              |
|                        | Pollination       | 98                | 0.001 | 0.709              |               |              |
|                        | Dispersal         | 89                | 0.071 | 0.095              |               |              |
|                        | Cultivated status | 102               | 0.002 | 0.628              |               |              |
|                        | Rarity status     | 98                | 0.045 | <b>0.035</b>       |               |              |
|                        | Mating system     | Life form         | 79    | 0.207              | <b>0.0002</b> | <b>0.021</b> |
|                        |                   | Pollination       | 78    | 0.118              | <b>0.002</b>  | 0.941        |
|                        |                   | Dispersal         | 77    | 0.214              | <b>0.001</b>  | <b>0.039</b> |
|                        |                   | Cultivated status | 79    | 0.126              | <b>0.002</b>  | 0.536        |
|                        |                   | Rarity status     | 78    | 0.176              | <b>0.002</b>  | <b>0.015</b> |
| With family effects    | Mating system     | 79                | 0.082 | <b>0.010</b>       |               |              |
|                        | Life form         | 93                | 0.005 | 0.814              |               |              |
|                        | Pollination       | 98                | 0.000 | 0.731              |               |              |
|                        | Dispersal         | 89                | 0.024 | 0.287              |               |              |
|                        | Cultivated status | 102               | 0.001 | 0.795              |               |              |
|                        | Rarity status     | 98                | 0.054 | <b>0.014</b>       |               |              |
|                        | Mating system     | Life form         | 79    | 0.103              | <b>0.008</b>  | 0.548        |
|                        |                   | Pollination       | 78    | 0.084              | <b>0.011</b>  | 0.951        |
|                        |                   | Dispersal         | 77    | 0.120              | <b>0.023</b>  | 0.543        |
|                        |                   | Cultivated status | 79    | 0.083              | <b>0.010</b>  | 0.582        |
|                        |                   | Rarity status     | 78    | 0.139              | <b>0.013</b>  | <b>0.024</b> |
