# Supplementary material
Source: PubMed Central journal article supplement (PMC1639510)
Supplement: rspb20063657s16.pdf [file rspb20063657s16.pdf]

### ESM3

Results of all two-way and three-way (with family effect) ANOVAs for  $\pi_s$ . No interaction was significant. Therefore interaction terms were removed from the analyses. The  $R^2$  is given for the couple of factors.

| Factors           |                   | <i>n</i> | Without family effects |                    |              | With family effects |                    |              |
|-------------------|-------------------|----------|------------------------|--------------------|--------------|---------------------|--------------------|--------------|
|                   |                   |          | $R^2$                  | $P_{\text{value}}$ |              | $R^2$               | $P_{\text{value}}$ |              |
|                   |                   |          |                        | Factor 1           | Factor 2     |                     | Factor 1           | Factor 2     |
| Mating system     | Life form         | 105      | 0.242                  | <b>&lt; 0.0001</b> | <b>0.001</b> | 0.091               | <b>0.002</b>       | 0.300        |
|                   | Pollination       | 104      | 0.132                  | <b>0.0002</b>      | 0.511        | 0.067               | <b>0.004</b>       | 0.948        |
|                   | Dispersal         | 104      | 0.200                  | <b>&lt; 0.0001</b> | <b>0.040</b> | 0.100               | <b>0.005</b>       | 0.514        |
|                   | Cultivated status | 105      | 0.133                  | <b>0.0001</b>      | 0.827        | 0.696               | <b>0.003</b>       | 0.931        |
|                   | Rarity status     | 104      | 0.192                  | <b>0.0002</b>      | <b>0.025</b> | 0.118               | <b>0.002</b>       | <b>0.050</b> |
| Life form         | Pollination       | 128      | 0.057                  | <b>0.031</b>       | 0.819        | 0.011               | 0.596              | 0.733        |
|                   | Dispersal         | 116      | 0.072                  | 0.084              | 0.723        | 0.022               | 0.647              | 0.477        |
|                   | Cultivated status | 131      | 0.061                  | <b>0.018</b>       | 0.331        | 0.011               | 0.580              | 0.827        |
|                   | Rarity status     | 124      | 0.097                  | <b>0.035</b>       | <b>0.024</b> | 0.055               | 0.609              | <b>0.009</b> |
| Pollination       | Dispersal         | 118      | 0.034                  | 0.551              | 0.299        | 0.015               | 0.651              | 0.380        |
|                   | Cultivated status | 133      | 0.001                  | 0.754              | 0.941        | 0.001               | 0.699              | 0.766        |
|                   | Rarity status     | 124      | 0.044                  | 0.737              | <b>0.023</b> | 0.046               | 0.678              | <b>0.009</b> |
| Dispersal         | Cultivated status | 119      | 0.031                  | 0.316              | 0.943        | 0.013               | 0.395              | 0.954        |
|                   | Rarity status     | 117      | 0.071                  | 0.448              | <b>0.045</b> | 0.055               | 0.706              | <b>0.031</b> |
| Cultivated status | Rarity status     | 128      | 0.044                  | 0.614              | <b>0.018</b> | 0.044               | 0.667              | <b>0.008</b> |
