# Supplementary material
Source: PubMed Central journal article supplement (PMC1639510)
Supplement: rspb20063657s17.pdf [file rspb20063657s17.pdf]

## ESM4

Results of the full ANOVAs (6 factors without interaction) with or without family effects for nuclear gene total nucleotide diversity ( $\pi_{\text{total}}$ ), silent site nucleotide diversity ( $\pi_{\text{silent}}$ ), and haplotype diversity. For clarity, results are split by factors than by the three analysed variables. Least squares means are given for the ANOVA that includes the plant family effects.  $n = 103$ .

| Factor            |                       | Without family effects |                           |                       | With family effects |                           |                       | Least Squares Estimates |                |                 |          |
|-------------------|-----------------------|------------------------|---------------------------|-----------------------|---------------------|---------------------------|-----------------------|-------------------------|----------------|-----------------|----------|
|                   |                       | <i>F</i>               | <i>p</i> <sub>value</sub> | <i>R</i> <sup>2</sup> | <i>F</i>            | <i>p</i> <sub>value</sub> | <i>R</i> <sup>2</sup> |                         |                |                 |          |
| Mating system     | $\pi_{\text{total}}$  | 23.28                  | <b>&lt;0.0001</b>         | 0.176                 | 8.70                | <b>0.004</b>              | 0.070                 | outcrossing             |                | selfing         |          |
|                   | $\pi_{\text{silent}}$ | 19.54                  | <b>&lt;0.0001</b>         | 0.148                 | 6.84                | <b>0.011</b>              | 0.055                 | 0.010                   |                | 0.005           |          |
|                   | Haplotype diversity   | 18.72                  | <b>&lt;0.0001</b>         | 0.137                 | 6.99                | <b>0.010</b>              | 0.054                 | 0.013                   |                | 0.006           |          |
| Life form         | $\pi_{\text{total}}$  | 3.58                   | <b>0.032</b>              | 0.027                 | 0.18                | 0.836                     | 0.003                 | Annual                  | Perrenial herb | Woody perrenial |          |
|                   | $\pi_{\text{silent}}$ | 5.43                   | <b>0.006</b>              | 0.082                 | 0.82                | 0.446                     | 0.013                 | 0.011                   |                | 0.010           |          |
|                   | Haplotype diversity   | 0.63                   | 0.534                     | 0.009                 | 0.25                | 0.78                      | 0.004                 | 0.658                   |                | 0.664           |          |
| Pollination       | $\pi_{\text{total}}$  | 0.01                   | 0.931                     | 0.000                 | 0.21                | 0.648                     | 0.002                 | Insects                 |                | Wind            |          |
|                   | $\pi_{\text{silent}}$ | 0.28                   | 0.5953                    | 0.002                 | 0.03                | 0.87                      | 0.000                 | 0.010                   |                | 0.006           |          |
|                   | Haplotype diversity   | 2.73                   | 0.102                     | 0.020                 | 0.06                | 0.806                     | 0.000                 | 0.010                   |                | 0.009           |          |
| Dispersal         | $\pi_{\text{total}}$  | 0.97                   | 0.137                     | 0.014                 | 0.66                | 0.579                     | 0.016                 | Gravity                 | Wind           | Attached        | Ingested |
|                   | $\pi_{\text{silent}}$ | 1.21                   | 0.309                     | 0.028                 | 0.53                | 0.663                     | 0.013                 | 0.009                   |                | 0.009           |          |
|                   | Haplotype diversity   | 1.14                   | 0.336                     | 0.025                 | 0.68                | 0.566                     | 0.016                 | 0.010                   |                | 0.006           |          |
| Cultivated status | $\pi_{\text{total}}$  | 0.01                   | 0.921                     | 0.000                 | 0.01                | 0.923                     | 0.000                 | Wild                    | Cultivated     |                 |          |
|                   | $\pi_{\text{silent}}$ | 0.66                   | 0.4178                    | 0.005                 | 0.42                | 0.518                     | 0.003                 | 0.008                   |                | 0.008           |          |
|                   | Haplotype diversity   | 0.42                   | 0.519                     | 0.003                 | 0.38                | 0.537                     | 0.003                 | 0.010                   |                | 0.009           |          |
| Rarity status     | $\pi_{\text{total}}$  | 1.89                   | 0.328                     | 0.007                 | 2.87                | 0.095                     | 0.023                 | Wild                    |                | Cultivated      |          |
|                   | $\pi_{\text{silent}}$ | 2.55                   | 0.113                     | 0.019                 | 4.70                | <b>0.034</b>              | 0.038                 | 0.008                   |                | 0.006           |          |
|                   | Haplotype diversity   | 5.39                   | <b>0.022</b>              | 0.039                 | 6.73                | <b>0.012</b>              | 0.052                 | 0.014                   |                | 0.006           |          |
